# Supplementary material for: Immobilized Soybean Peroxidase Hybrid Biocatalysts for Efficient Degradation of Various Emerging Pollutants
Source: MDPI journal article supplement (doi:10.3390/biom11060904), 2021-06-17
Supplement: s1 [file s1]

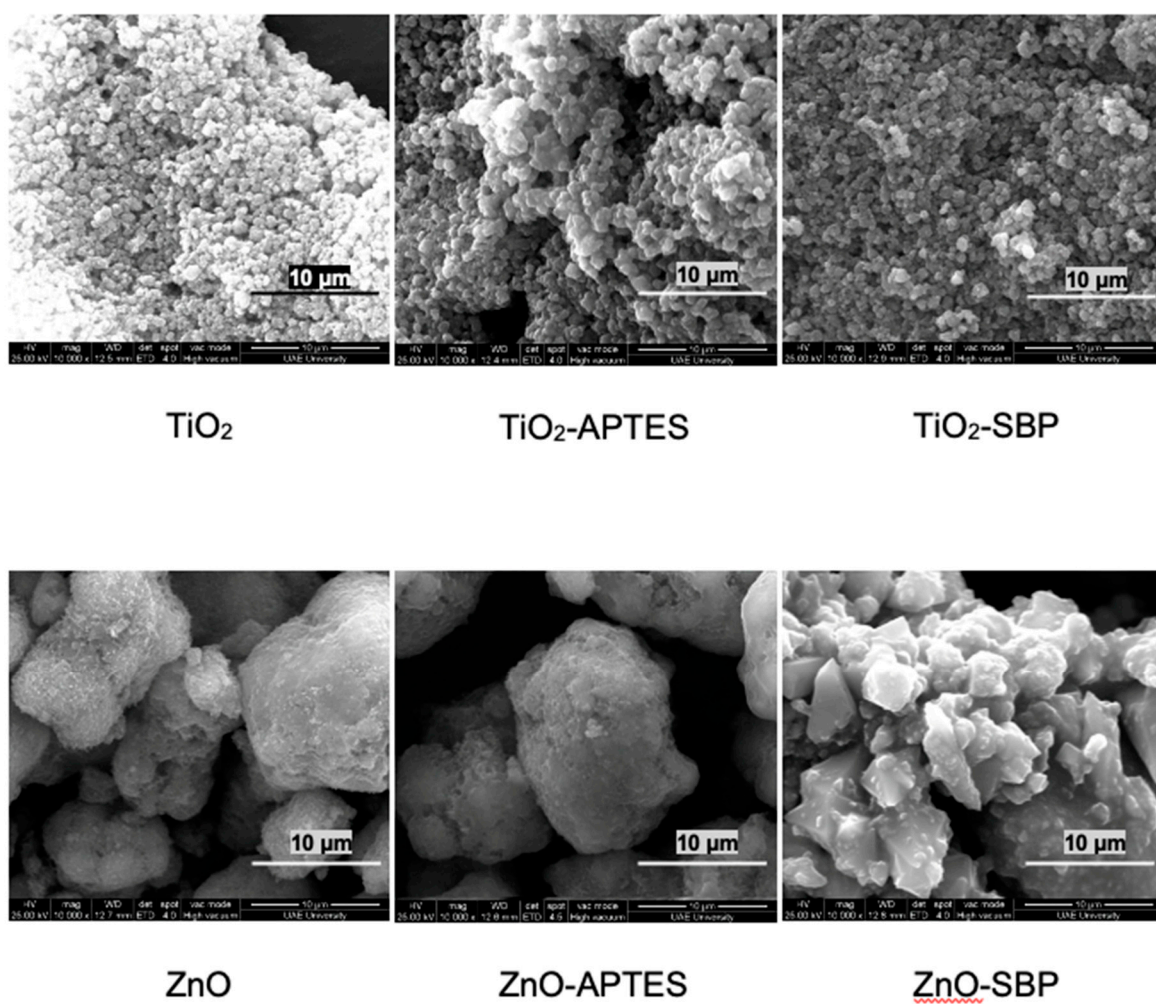

**Figure S1:** Scanning electron microscope (SEM) images of pure photocatalysts ( $\text{TiO}_2$  and  $\text{ZnO}$ ), functionalized photocatalysts ( $\text{TiO}_2\text{-APTES}$  and  $\text{ZnO-APTES}$ ) and immobilized SBP enzyme on the photocatalysts ( $\text{TiO}_2\text{-SBP}$  and  $\text{ZnO-SBP}$ ).

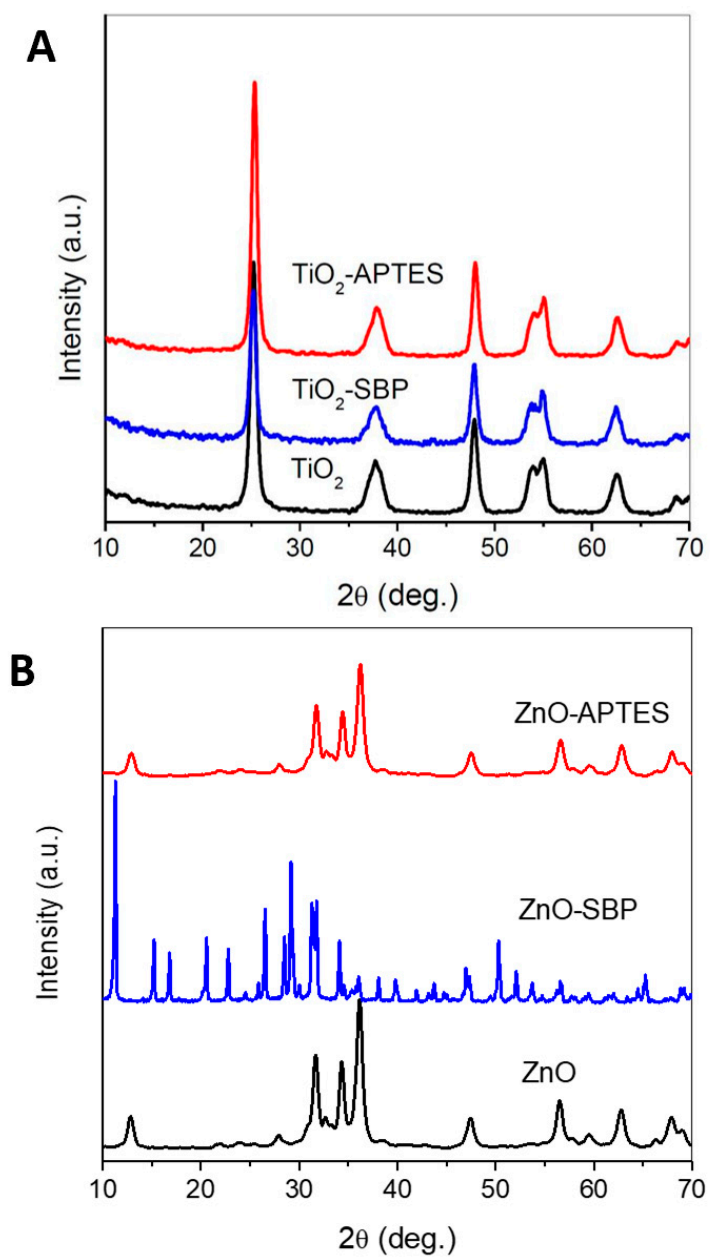

**Figure S2:** X-ray diffraction (XRD) patterns of (A) pure TiO<sub>2</sub>, functionalized TiO<sub>2</sub> (TiO<sub>2</sub>-APTES) and SBP enzyme immobilized on TiO<sub>2</sub> (TiO<sub>2</sub>-SBP) and (B) pure ZnO, functionalized ZnO (ZnO-APTES) and SBP enzyme immobilized on ZnO (ZnO-SBP).

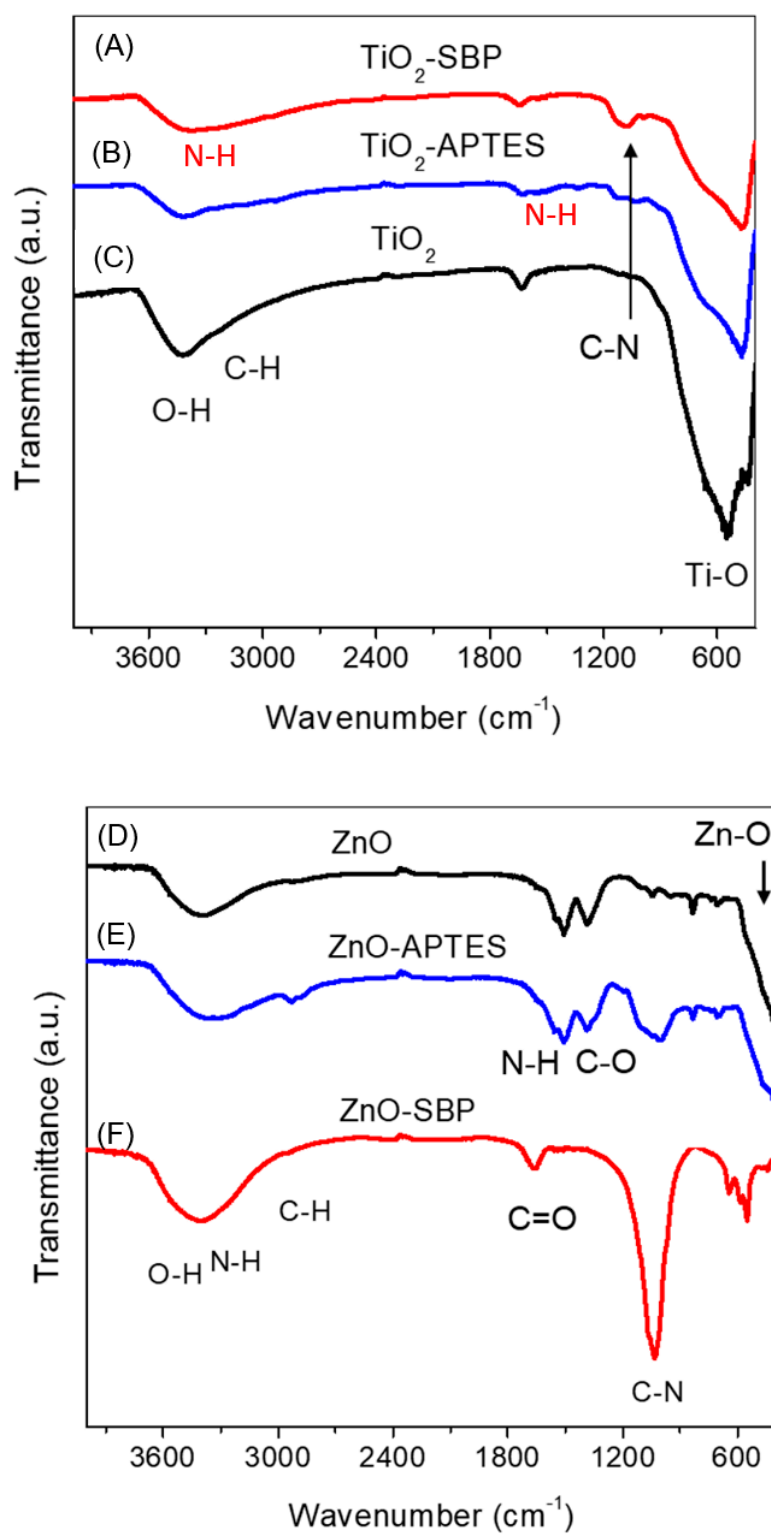

**Figure S3:** Fourier transform infrared spectroscopy (FTIR) spectra of (A)  $\text{TiO}_2$ -SBP; (B)  $\text{TiO}_2$ -APTES; (C)  $\text{TiO}_2$ ; (D) ZnO; (E) ZnO-APTES and (F) ZnO-SBP.

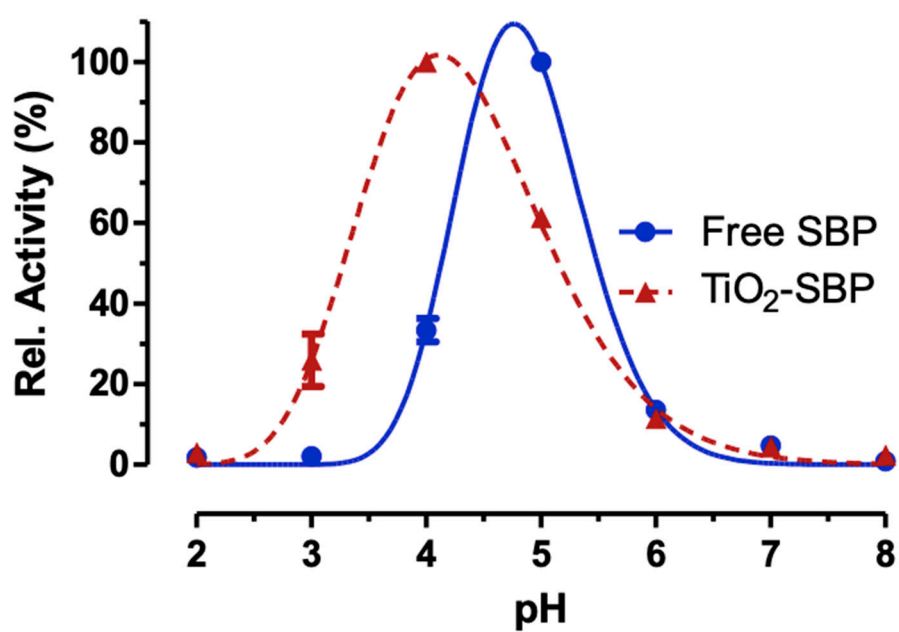

(A)

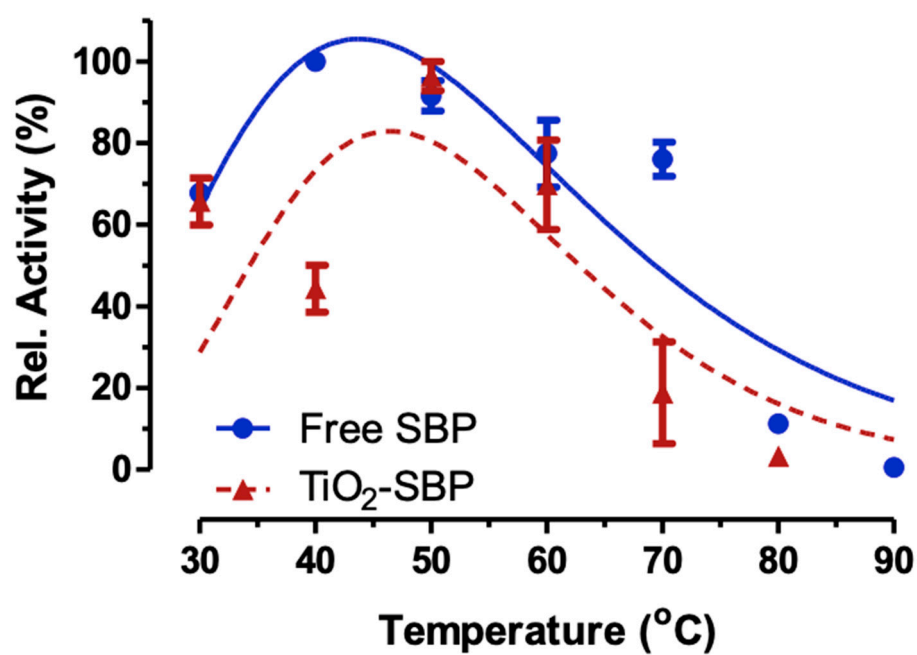

(B)

**Figure S4:** Influence of pH and temperature on the activity of free SBP and immobilized SBP on TiO<sub>2</sub> (TiO<sub>2</sub>-SBP). (A) pH 2.0-8.0 and (B) temperature 30-90° C.

**Table S1.** Summary of MRM mode for the 21 treated emerging pollutants.

|    | <b>Emerging<br/>Pollutant</b> | <b>Retention<br/>Time (min)</b> | <b>Parent Ion (m/z)</b> | <b>Daughter Ion<br/>(m/z)</b> | <b>Polarity</b> | <b>Collision<br/>Energy (V)</b> |
|----|-------------------------------|---------------------------------|-------------------------|-------------------------------|-----------------|---------------------------------|
| 1  | Roxithromycin                 | 11.6                            | 837                     | 680                           | Positive        | 20                              |
| 2  | Lincomycin-HCl                | 7.6                             | 407                     | 359                           | Positive        | 20                              |
| 3  | Meloxicam                     | 12.8                            | 352                     | 115                           | Positive        | 6                               |
| 4  | Norfloxacin                   | 8.2                             | 320                     | 302                           | Positive        | 20                              |
| 5  | Trimethoprim                  | 7.9                             | 291                     | 230                           | Positive        | 20                              |
| 6  | Venlafaxine-HCl               | 9.4                             | 278                     | 260                           | Positive        | 10                              |
| 7  | Atenolol                      | 7.1                             | 267                     | 190                           | Positive        | 20                              |
| 8  | SMX                           | 9.3                             | 254                     | 156                           | Positive        | 20                              |
| 9  | Cimetidine                    | 6.9                             | 253                     | 159                           | Positive        | 10                              |
| 10 | Phenytoin                     | 11.1                            | 253                     | 182                           | Positive        | 10                              |
| 11 | Prometryn                     | 11.6                            | 242                     | 158                           | Positive        | 30                              |
| 12 | Fluometuron                   | 11.7                            | 233                     | 72                            | Positive        | 30                              |
| 13 | Ibuprofen                     | 14.4                            | 207                     | 161                           | Positive        | 20                              |
| 14 | Thiabendazole                 | 7.6                             | 202                     | 175                           | Positive        | 30                              |
| 15 | MCPA                          | 12                              | 201                     | 125                           | Positive        | 13                              |
| 16 | Caffeine                      | 7.8                             | 195                     | 138                           | Positive        | 30                              |
| 17 | DEET                          | 11.9                            | 192                     | 119                           | Positive        | 30                              |
| 18 | Caffeic acid                  | 7.8                             | 181                     | 163                           | Positive        | 20                              |
| 19 | MBT                           | 10.6                            | 168                     | 135                           | Positive        | 30                              |
| 20 | Furosemide                    | 11                              | 329                     | 285                           | Negative        | 15                              |
| 21 | Hydrochlorothiazide           | 6.4                             | 167                     | 190                           | Negative        | 20                              |
